# Supplementary material for: Construction of spin crossover-fluorescence bifunctional iron(ii) complexes with modified bis(pyrazole)pyridine ligands
Source: Royal Society of Chemistry journal article supplement (doi:10.1039/d3nj01431b), 2023-01-01
Supplement: d3nj01431b1.pdf [file d3nj01431b1.pdf]

## Supplementary Materials

### Construction of spin crossover-fluorescence bifunctional iron(II) complexes with modified bis(pyrazole)pyridine ligands

Guo-Hui Zhao<sup>a</sup>, Shi-Hui Zhang<sup>a</sup>, Cheng Yi<sup>a</sup>, Tao Liu<sup>a</sup>, Yin-Shan Meng<sup>\*a</sup>

<sup>a</sup>*State Key Laboratory of Fine Chemicals, Dalian University of Technology, Dalian, 116024, P. R. China*

E-mail: [mengys@dlut.edu.cn](mailto:mengys@dlut.edu.cn) (Y. S. Meng)

## Experimental section.

### Materials

bpp-NH<sub>2</sub>, bpp-I, bpp-CH<sub>2</sub>Br, and bpp-CH<sub>2</sub>P(O)(OEt)<sub>2</sub> were prepared according to literature methods<sup>37-40</sup>. The chemical reagents used are all analytical reagents sold on the market. If there is no special explanation in this paper, it is directly used.

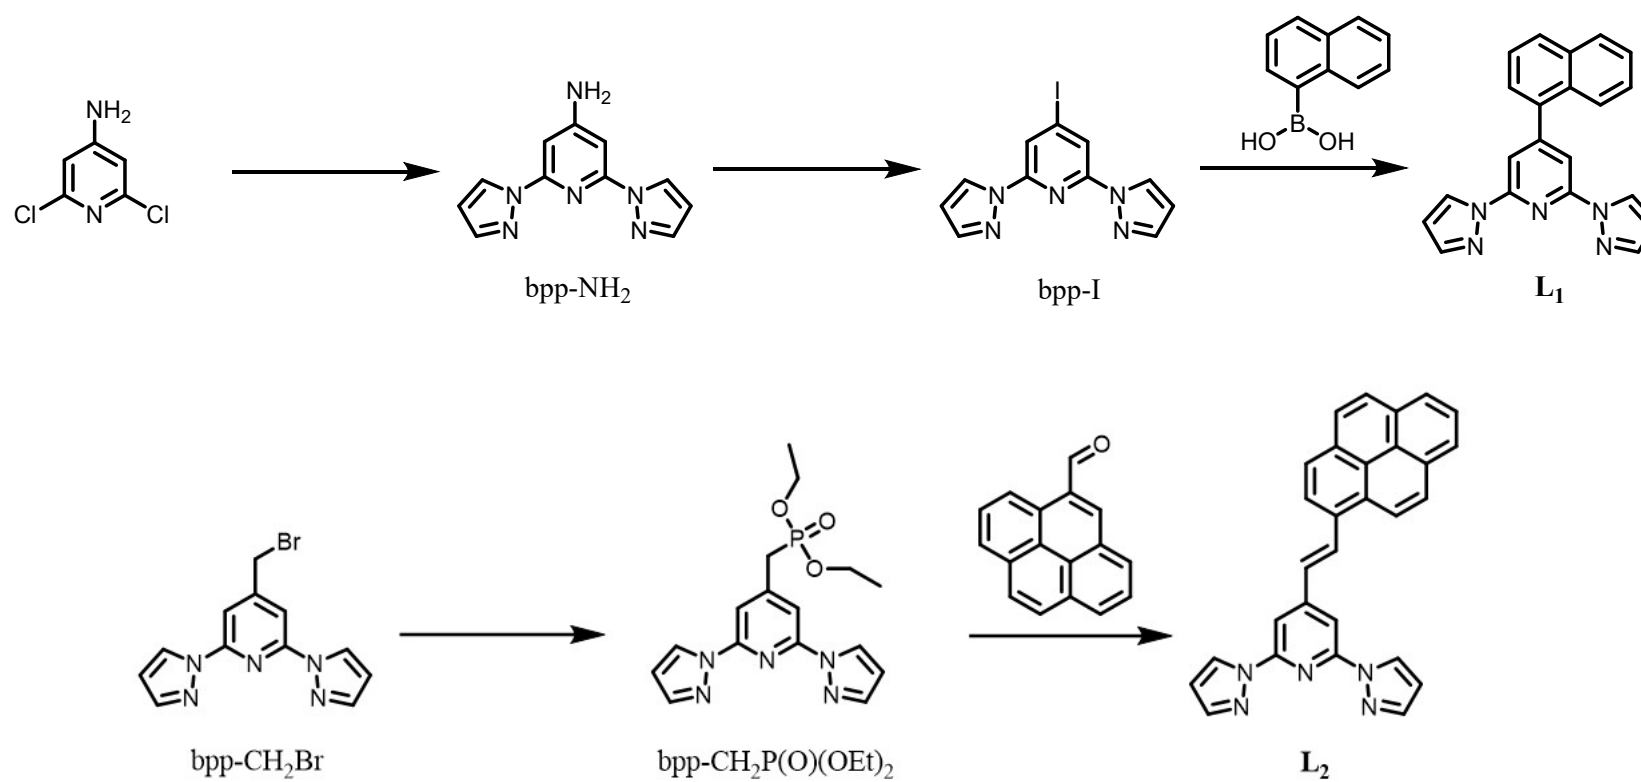

Scheme S1

## Synthesis of ligand L<sub>1</sub>

Under nitrogen condition, bpp-I (4.643 g, 13.8 mmol), 1-naphthoboric acid (2.37 g, 13.8 mmol) and  $\text{Pd}(\text{PPh}_3)_4$  (1.581 g, 1.4 mmol) were added to 150 mL of 1,4-dioxane and  $\text{Na}_2\text{CO}_3$  solution (4.0 M, 50 mL) and stirred at 70 °C for reflux for 5 days. At the end of the reaction, the solvent was removed, followed by the extraction with 100 mL  $\text{CHCl}_3$  for twice and washed with water for twice. The organic layer was then dried with anhydrous  $\text{MgSO}_4$ , and the solid was washed with methanol to remove soluble impurities. The crude product was purified by alumina column chromatography (ethyl acetate: n-hexane = 1:4) to obtain the pure ligand L<sub>1</sub>.  $^1\text{H}$  NMR (500 MHz, Chloroform-d)  $\delta$  8.65–8.62 (m, 2H), 8.20 (s, 2H), 7.96–7.92 (m, 2H), 7.82 (s, 1H), 7.63–7.38 (m, 6H), 6.38–6.29 (m, 2H). MS (ESI-TOF):  $m/z$  360.13  $[\text{M}+\text{Na}]^+$ . Anal. Calcd for  $\text{C}_{21}\text{H}_{15}\text{N}_5$ : C, 74.76; H, 4.48; N, 20.76. Found: C, 74.98; H, 4.31; N, 20.41.

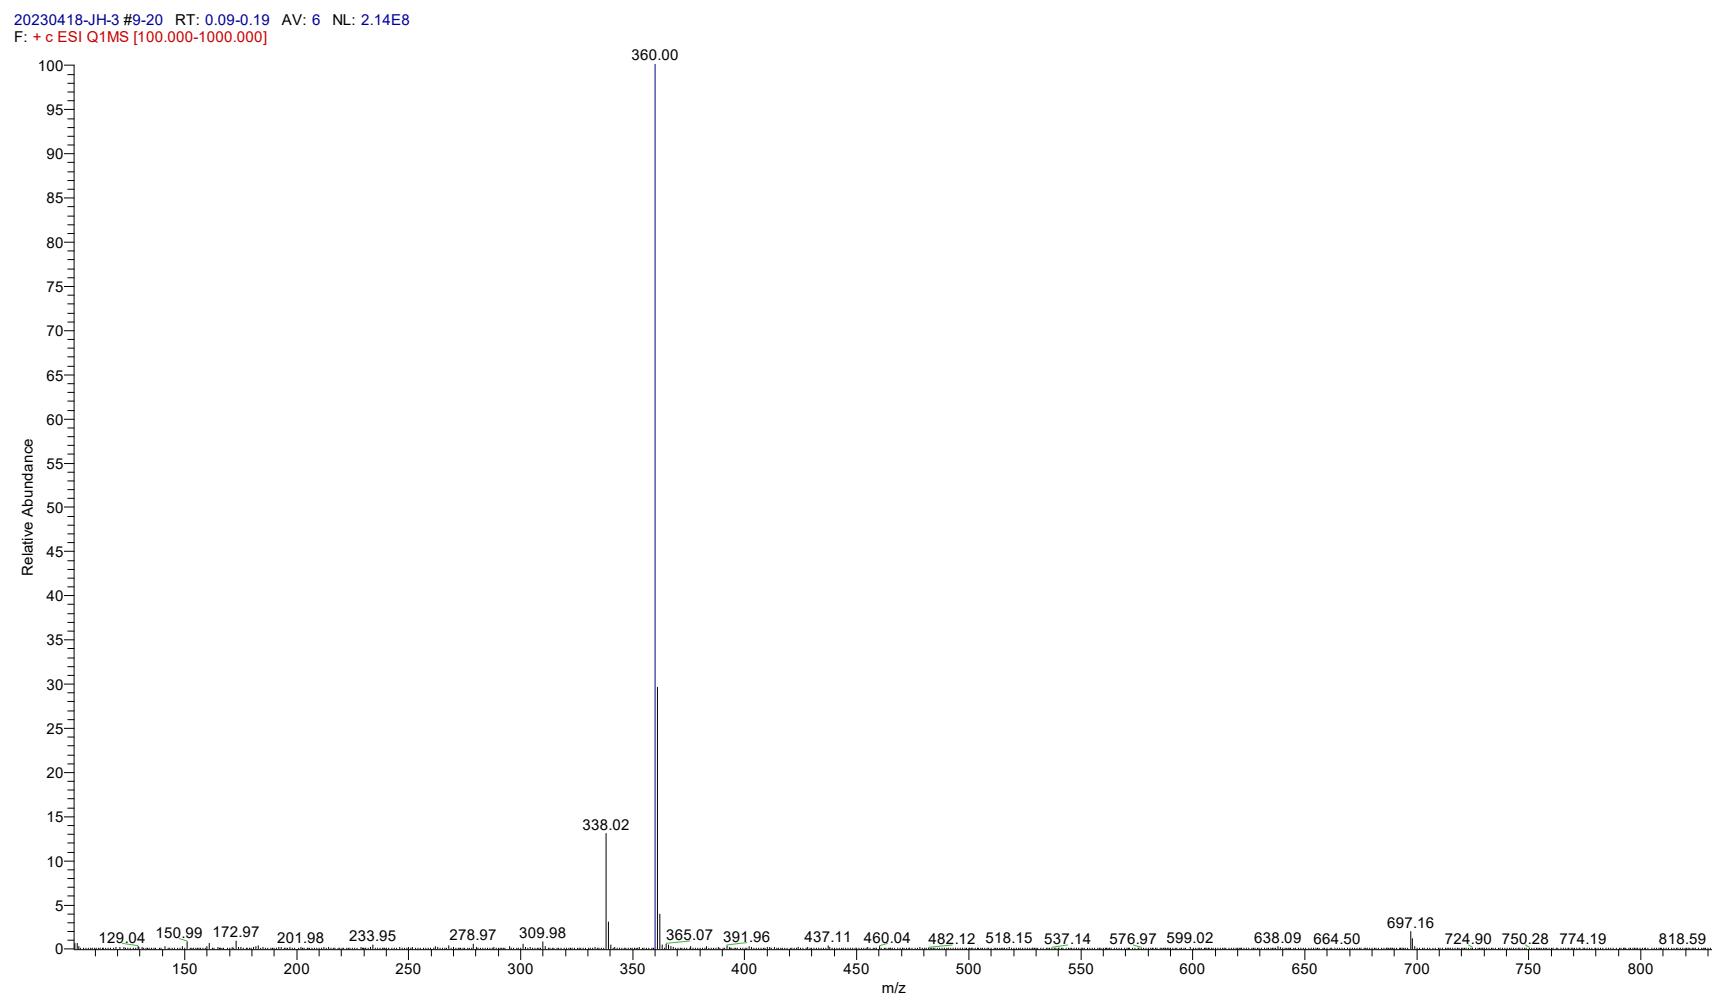

Fig. S1 The mass spectrometry of L<sub>1</sub>.

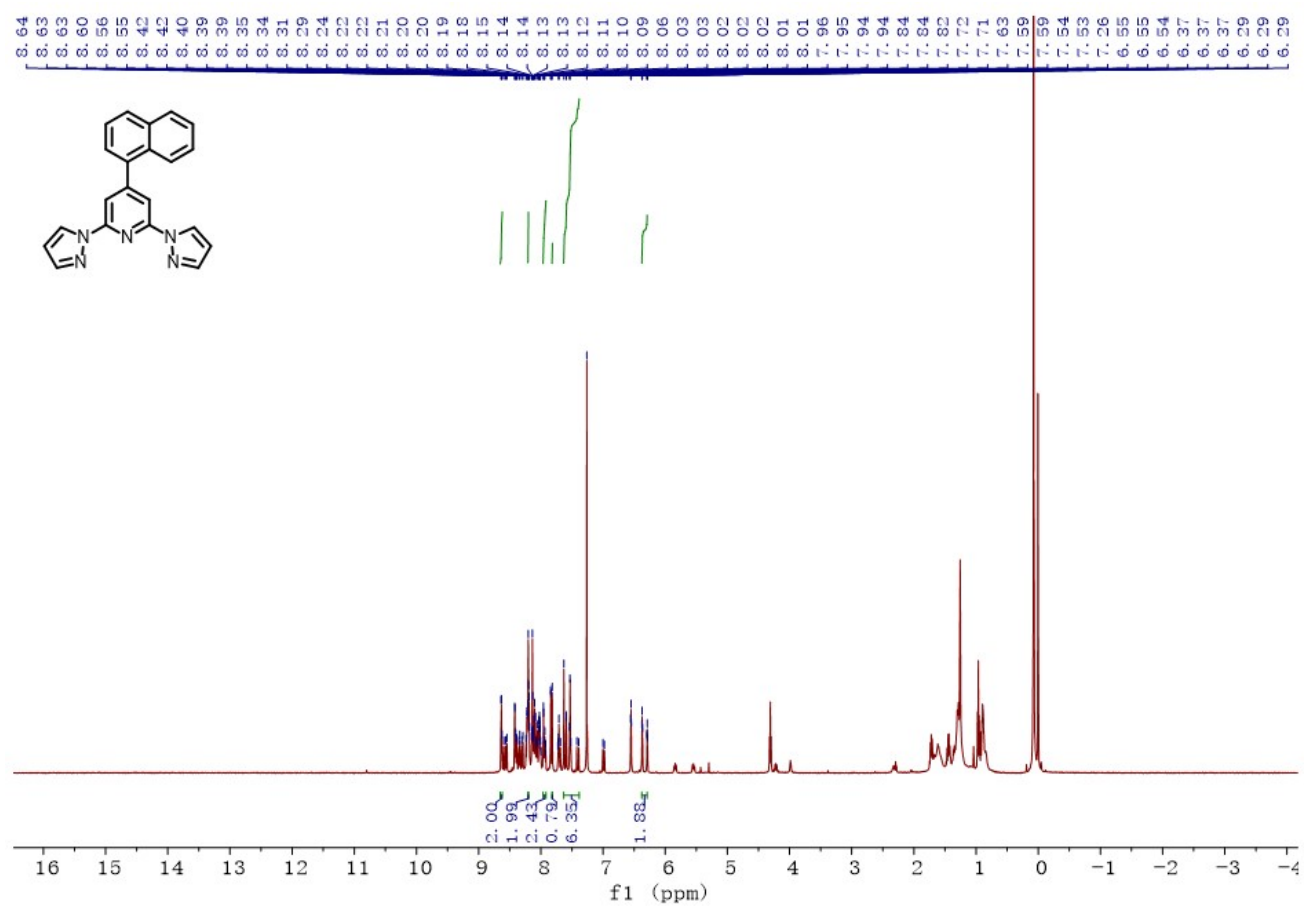

**Fig. S2** <sup>1</sup>H NMR spectrum of **L<sub>1</sub>** (500 MHz) in CDCl<sub>3</sub>.

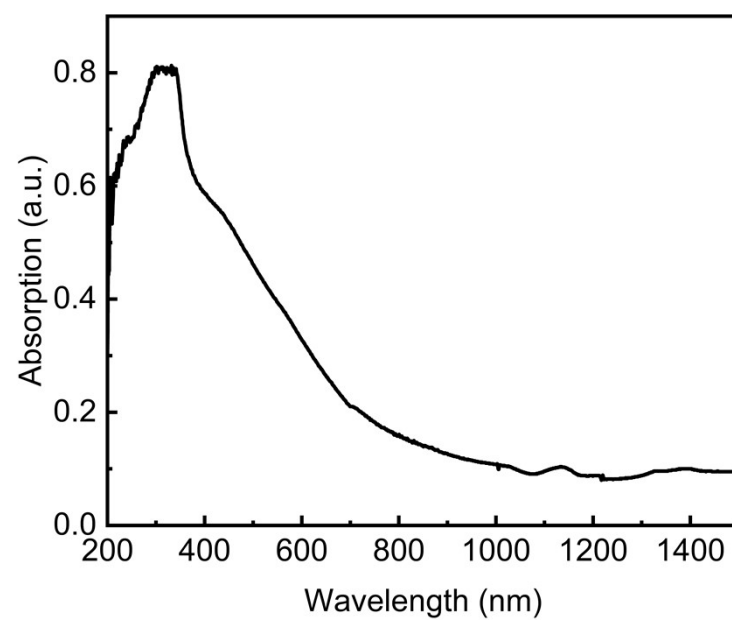

**Fig. S3** UV-vis absorption spectroscopy of **L<sub>1</sub>**.

## Synthesis of ligand L<sub>2</sub>

**bpp-CH<sub>2</sub>P(O)(OEt)<sub>2</sub>** (0.36 g, 1 mmol), 1-pyrene formaldehyde (0.17 g, 1 mmol) and 40 mL anhydrous THF solution were added to a 100 mL three-way flask and placed in an ice bath. Potassium tert-butanol (0.17 g, 1.5 mmol) was slowly added under nitrogen condition and stirred for 2 h. After the reaction, it was quenched with 15 mL water, extracted with CH<sub>2</sub>Cl<sub>2</sub>, washed with water for three times in the organic layer, and then washed with NaCl solution. The crude product was purified by column chromatography (ethyl acetate: n-hexane =5:95), and L<sub>2</sub> obtained <sup>1</sup>H NMR (500 MHz, Chloroform-d) δ 8.67 (dd, J = 2.6, 0.7 Hz, 1H), 8.22–7.89 (m, 6H), 7.86–7.74 (m, 3H), 7.54–7.47 (m, 5H), 7.29 (dd, J = 8.3, 7.4 Hz, 1H), 6.82 (dd, J = 7.4, 1.1 Hz, 1H), 6.54 (dd, J = 2.7, 1.6 Hz, 2H). MS (ESI-TOF): m/z 460.16 [M+Na]<sup>+</sup>. Anal. Calcd for C<sub>29</sub>H<sub>19</sub>N<sub>5</sub>: C, 79.61; H, 4.38; N, 16.01. Found: C, 79.93; H, 4.40; N, 15.64.

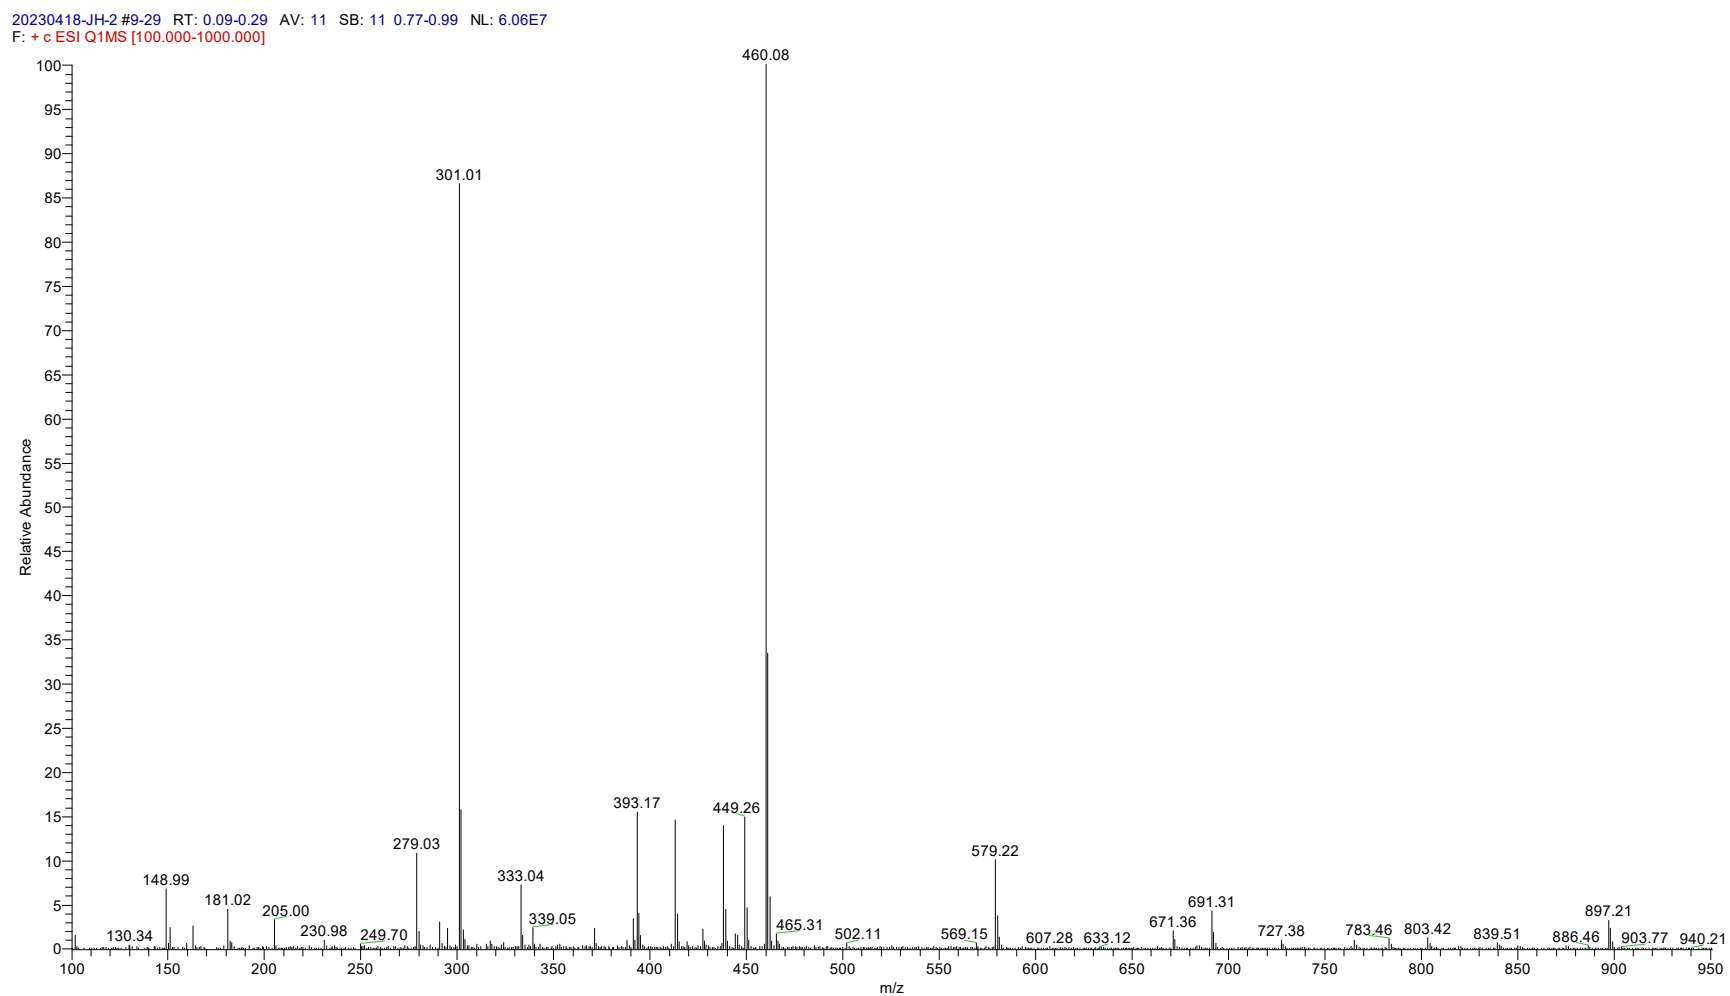

Fig. S4 The mass spectrometry of L<sub>2</sub>.

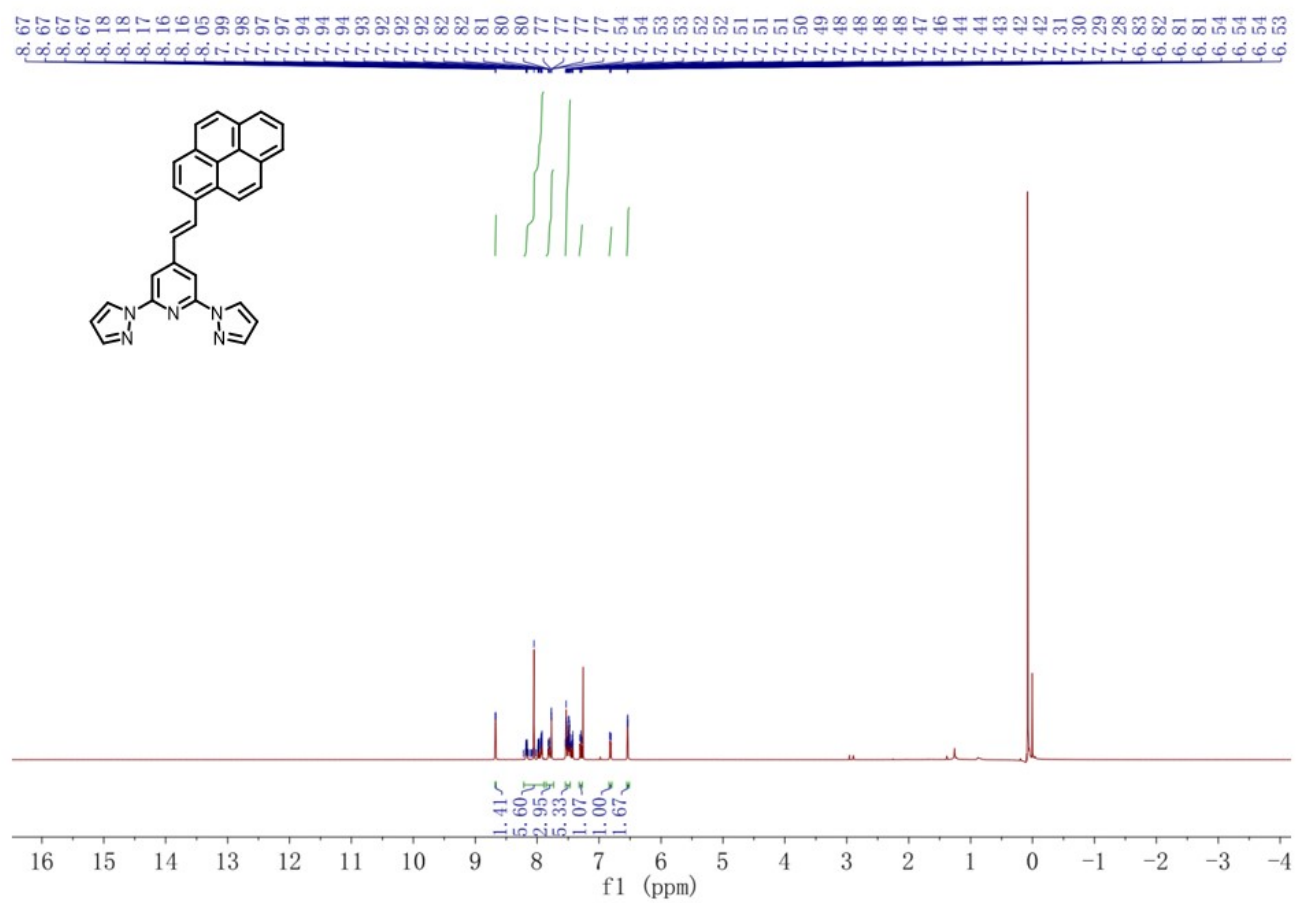

**Fig. S5** <sup>1</sup>H NMR spectrum of **L<sub>2</sub>** (500 MHz) in CDCl<sub>3</sub>.

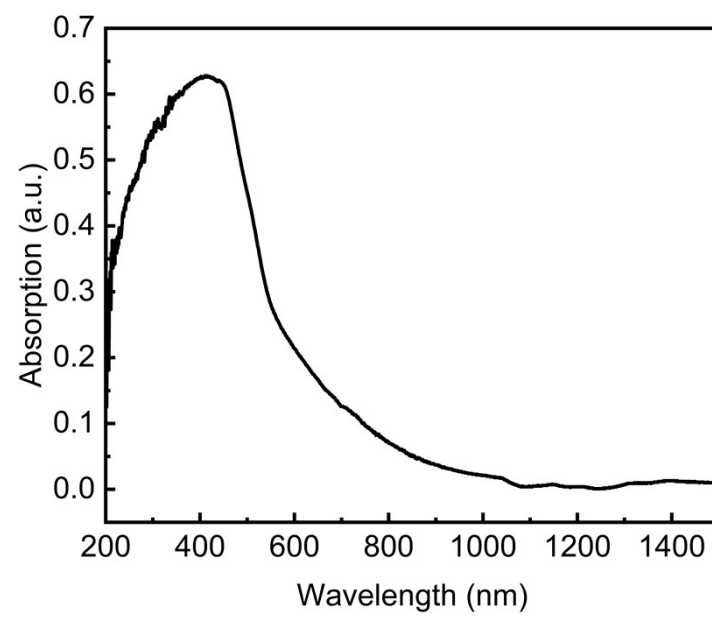

**Fig. S6** UV-vis absorption spectroscopy of **L<sub>2</sub>**.

**Table S1.** Crystallographic data for **1** and **2** at different temperatures.

| Compound                                              | <b>1</b>                                                                         | <b>1</b>                                                                         | <b>2</b>                                                                         |
|-------------------------------------------------------|----------------------------------------------------------------------------------|----------------------------------------------------------------------------------|----------------------------------------------------------------------------------|
| CCDC                                                  | 2249925                                                                          | 2249928                                                                          | 2249929                                                                          |
| T, K                                                  | 120                                                                              | 400                                                                              | 120                                                                              |
| formula                                               | C <sub>42</sub> H <sub>30</sub> Cl <sub>2</sub> FeN <sub>10</sub> O <sub>8</sub> | C <sub>42</sub> H <sub>30</sub> Cl <sub>2</sub> FeN <sub>10</sub> O <sub>8</sub> | C <sub>61</sub> H <sub>46</sub> Cl <sub>8</sub> FeN <sub>10</sub> O <sub>9</sub> |
| <i>F</i> w                                            | 929.51                                                                           | 929.51                                                                           | 1402.53                                                                          |
| crystal system                                        | Orthorhombic                                                                     | Orthorhombic                                                                     | Triclinic                                                                        |
| Space group                                           | <i>Pcca</i>                                                                      | <i>Pcca</i>                                                                      | <i>P</i> $\bar{1}$                                                               |
| <i>a</i> , Å                                          | 22.1519(13)                                                                      | 22.690(2)                                                                        | 13.5982(6)                                                                       |
| <i>b</i> , Å                                          | 11.7439(7)                                                                       | 11.9056(11)                                                                      | 14.4074(7)                                                                       |
| <i>c</i> , Å                                          | 14.6586(7)                                                                       | 14.9474(19)                                                                      | 17.2229(8)                                                                       |
| $\alpha$ , °                                          | 90                                                                               | 90                                                                               | 96.619(2)                                                                        |
| $\beta$ , °                                           | 90                                                                               | 90                                                                               | 102.0490(10)                                                                     |
| $\gamma$ , °                                          | 90                                                                               | 90                                                                               | 113.550(2)                                                                       |
| <i>V</i> , Å <sup>3</sup>                             | 3813.4(4)                                                                        | 4037.8(7)                                                                        | 2949.8(2)                                                                        |
| <i>Z</i>                                              | 8                                                                                | 8                                                                                | 2                                                                                |
| $\rho_{\text{calc}}/\text{cm}^3$                      | 1.619                                                                            | 1.529                                                                            | 1.579                                                                            |
| <i>F</i> (000)                                        | 1904.0                                                                           | 1904.0                                                                           | 1432.0                                                                           |
| Reflections collected                                 | 28492                                                                            | 18741                                                                            | 75707                                                                            |
| Unique reflections ( <i>R</i> <sub>int</sub> )        | 5451                                                                             | 4127                                                                             | 13508                                                                            |
| Goodness-of-fit on <i>F</i> <sup>2</sup>              | 1.021                                                                            | 1.083                                                                            | 1.048                                                                            |
| <i>R</i> <sub>1</sub> [ <i>I</i> ≥ 2σ( <i>I</i> )]a   | 0.0543                                                                           | 0.1179                                                                           | 0.0872                                                                           |
| w <i>R</i> <sub>2</sub> [ <i>I</i> ≥ 2σ( <i>I</i> )]b | 0.1207                                                                           | 0.1915                                                                           | 0.2550                                                                           |

$$R_1 = \Sigma (|F_o| - |F_c|) / \Sigma |F_o|; wR_2 = [\Sigma w (|F_o| - |F_c|)^2 / \Sigma w F_o^2]^{1/2}$$

**Table S2.** Selected Bond lengths (Å) for **1** and **2** at different temperatures.

| <b>1</b>             |            |           | <b>2</b>             |           |
|----------------------|------------|-----------|----------------------|-----------|
|                      | 120 K      | 400 K     |                      | 120 K     |
| No                   | Length(Å)  | Length(Å) | No                   | Length(Å) |
| Fe1–N1               | 1.8964(19) | 2.054(6)  | Fe1–N1               | 1.888(3)  |
| Fe1–N1               | 1.8964(19) | 2.054(6)  | Fe1–N2               | 1.976(3)  |
| Fe1–N2               | 1.964(2)   | 2.110(7)  | Fe1–N3               | 1.981(4)  |
| Fe1–N2               | 1.964(2)   | 2.110(7)  | Fe1–N4               | 1.890(3)  |
| Fe1–N3               | 1.966(2)   | 2.112(7)  | Fe1–N5               | 1.970(4)  |
| Fe1–N3               | 1.966(2)   | 2.112(7)  | Fe1–N6               | 1.963(4)  |
| Fe1–N <sub>avg</sub> | 1.942      | 2.092     | Fe1–N <sub>avg</sub> | 1.944     |



**Table S3.** Selected Bond Angles (°) for **1** at different temperatures.

| Compound             | <b>1</b>   |          |
|----------------------|------------|----------|
|                      | 120        | 400      |
| N1–Fe1–N1            | 178.47(13) | 176.6(4) |
| N1–Fe1–N3            | 98.95(9)   | 75.0(3)  |
| N1–Fe1–N3            | 79.96(9)   | 107.4(3) |
| N1–Fe1–N3            | 79.96(9)   | 75.0(3)  |
| N1–Fe1–N3            | 98.95(9)   | 107.4(3) |
| N1–Fe1–N2            | 80.09(9)   | 102.4(3) |
| N1–Fe1–N2            | 100.98(9)  | 75.2(3)  |
| N1–Fe1–N2            | 80.09(9)   | 75.2(3)  |
| N1–Fe1–N2            | 100.98(9)  | 102.4(3) |
| N3–Fe1–N3            | 90.57(13)  | 93.9(4)  |
| N2–Fe1–N3            | 91.92(9)   | 150.2(3) |
| N2–Fe1–N3            | 160.04(8)  | 94.7(3)  |
| N2–Fe1–N3            | 91.92(9)   | 94.7(3)  |
| N2–Fe1–N3            | 160.04(8)  | 150.2(3) |
| N2–Fe1–N2            | 92.47(13)  | 91.9(4)  |
| $\Sigma_{\text{Fe}}$ | 86.64      | 134.4    |
| CShM <sub>Fe</sub>   | 2.061      | 4.522    |

$\Sigma_{\text{Fe}}$ : the sum of  $|90-\alpha|$  for the 12 *cis*-N-Fe-N angles around the iron atom. CShM<sub>Fe</sub>: the continuous shape measurement relative to ideal octahedron of the Fe center.

**Table S4.** Selected Bond Angles (°) for **2** at 120 K.

| Compound             | <b>2</b>   |
|----------------------|------------|
| Temperature(K)       | 120        |
| N2–Fe1–N3            | 160.00(13) |
| N4–Fe1–N2            | 99.03(13)  |
| N4–Fe1–N5            | 80.13(14)  |
| N4–Fe1–N6            | 80.35(14)  |
| N4–Fe1–N3            | 100.96(14) |
| N1–Fe1–N2            | 80.12(13)  |
| N1–Fe1–N4            | 175.44(15) |
| N1–Fe1–N5            | 104.33(14) |
| N1–Fe1–N6            | 95.21(14)  |
| N1–Fe1–N3            | 79.97(14)  |
| N5–Fe1–N2            | 90.15(14)  |
| N5–Fe1–N3            | 92.92(16)  |
| N6–Fe1–N2            | 93.69(14)  |
| N6–Fe1–N5            | 160.46(13) |
| N6–Fe1–N3            | 89.98(16)  |
| $\Sigma_{\text{Fe}}$ | 85.74      |
| CShM <sub>Fe</sub>   | 2.132      |

$\Sigma_{\text{Fe}}$ : the sum of  $|90-\alpha|$  for the 12 *cis*-N-Fe-N angles around the iron atom. CShM<sub>Fe</sub>: the continuous shape measurement relative to the ideal octahedron of the Fe center.

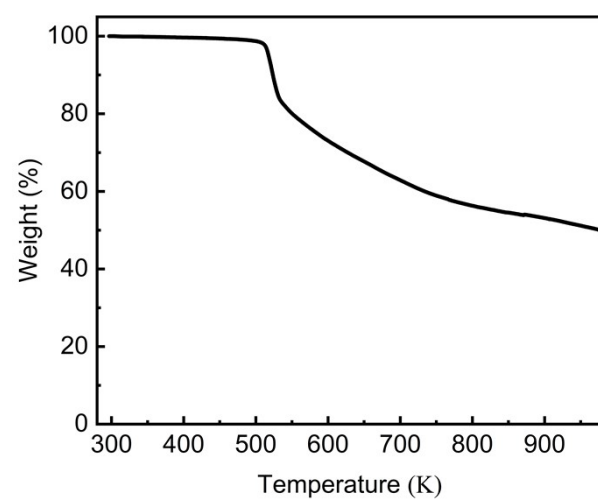

**Fig. S7** TGA curve for complex **1** in N<sub>2</sub> atmosphere with a heating rate of 10 K·min<sup>-1</sup>.

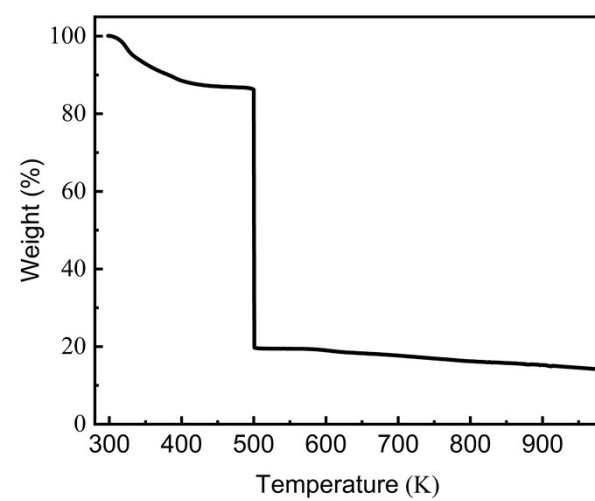

**Fig. S8** TGA curve for complex **2** in N<sub>2</sub> atmosphere with a heating rate of 10 K·min<sup>-1</sup>.

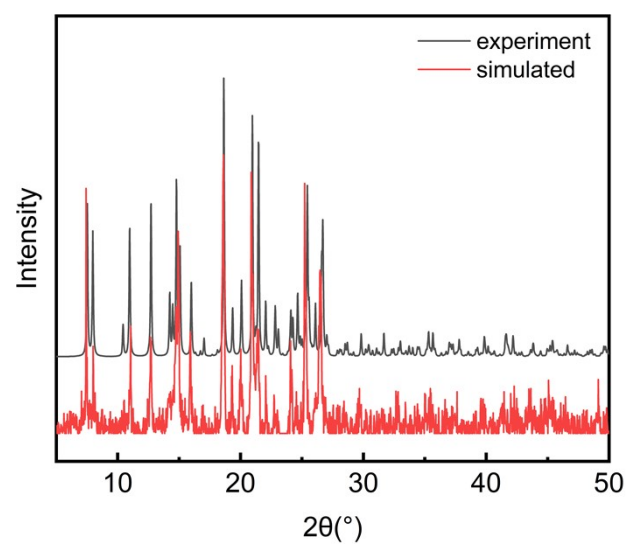

**Fig. S9** The PXRD pattern of complex 1 and the simulated one based on the single-crystal structure.

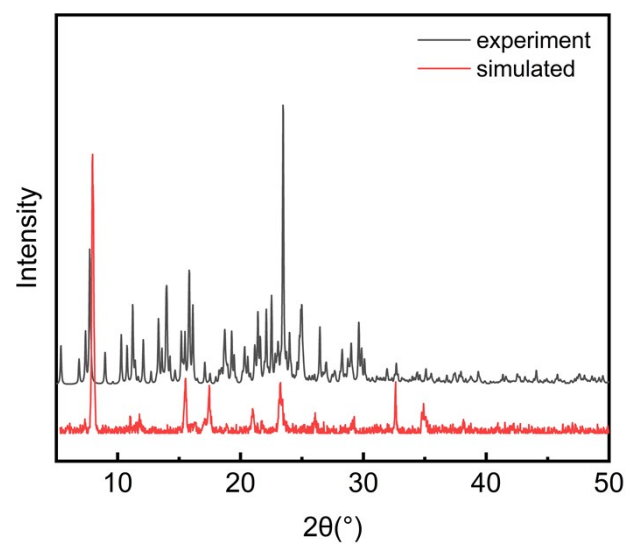

**Fig. S10** The PXRD pattern of complex **2** and the simulated one based on the single-crystal structure.

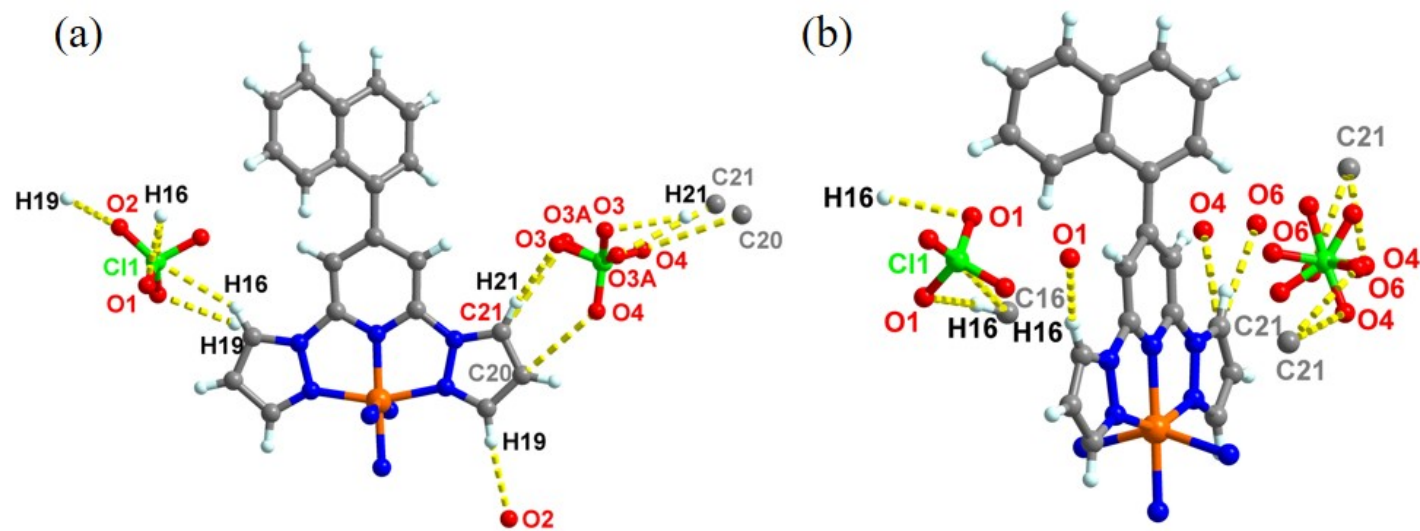

**Fig. S11** The intermolecular short contact interactions (yellow dashed lines) for **1** at 120K (a) and 400 K (b).

**Table S5.** Short contact interactions for **1** at 120 and 400 K.

| <b>1</b>                             |           |                                     |            |
|--------------------------------------|-----------|-------------------------------------|------------|
| 120 K                                |           | 400 K                               |            |
| C16 – H16···C1 1                     | 3.574(25) |                                     |            |
| C16 – H16···O1                       | 3.260(32) | C16 – H16···C1 1<br>[x,-y+1,z-1/2]  | 3.670(98)  |
| C16 – H16···O1<br>[-x+3/2,-y+1,z]    | 3.368(32) | C16 – H16···O1<br>[-x+3/2,y,z-1/2]  | 3.252(121) |
| C18 – H18···O4<br>[-x+3/2,y,z-1/2]   | 3.562(35) | C18 – H18···O5<br>[x+1/2,-y,-z+1/2] | 3.510(186) |
| C19 – H19···O2<br>[-x+3/2,y+1,z+1/2] | 3.400(31) |                                     |            |
| C20 – H20···O4                       | 3.138(36) |                                     |            |
| C21 – H21···O3                       | 3.238(56) | C21 – H21···O4<br>[x,-y,z+1/2]      | 3.167(175) |
| C21 – H21···O3A                      | 3.181(54) | C21 – H21···O6<br>[-x+1,-y,-z+1]    | 3.175(184) |



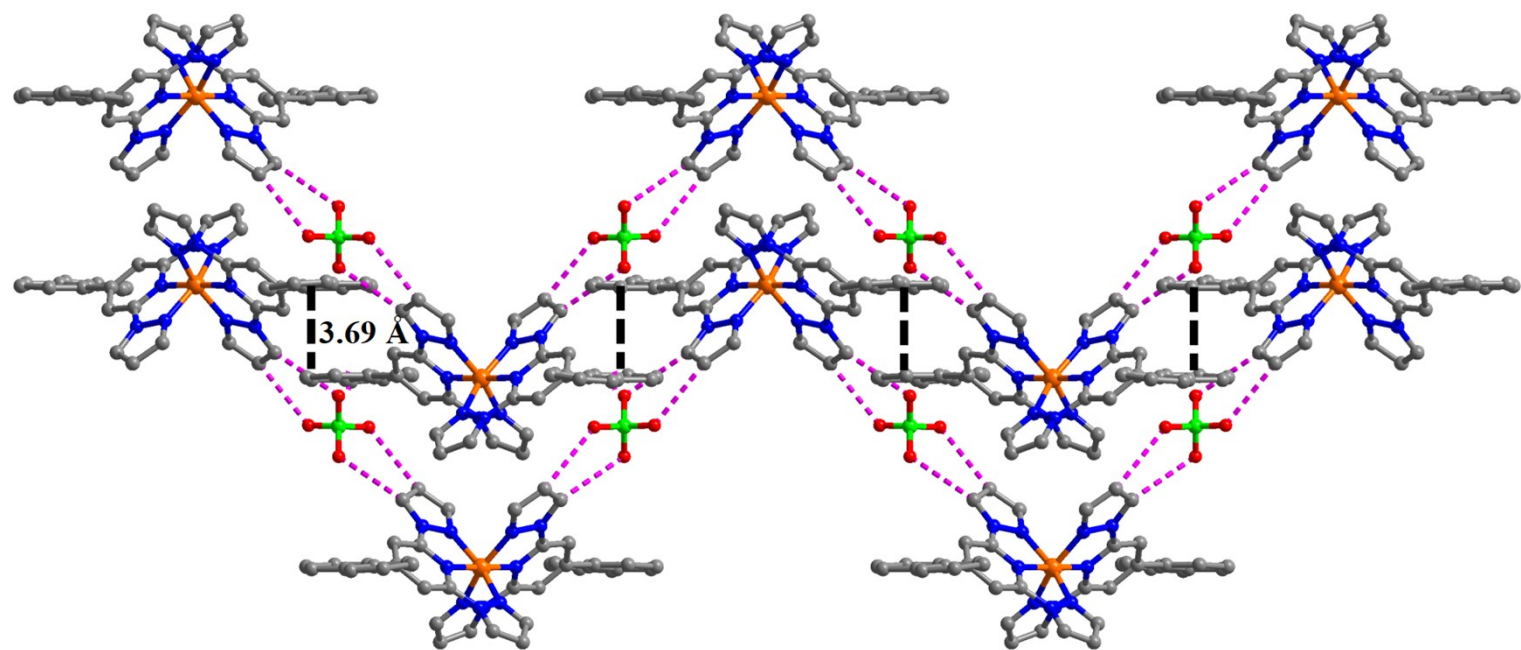

**Fig. S12** The molecular packing of **1** at 400 K. The black dashed lines represent  $\pi \cdots \pi$  interactions, and the pink dashed lines represent C-H $\cdots$ O hydrogen bonds.

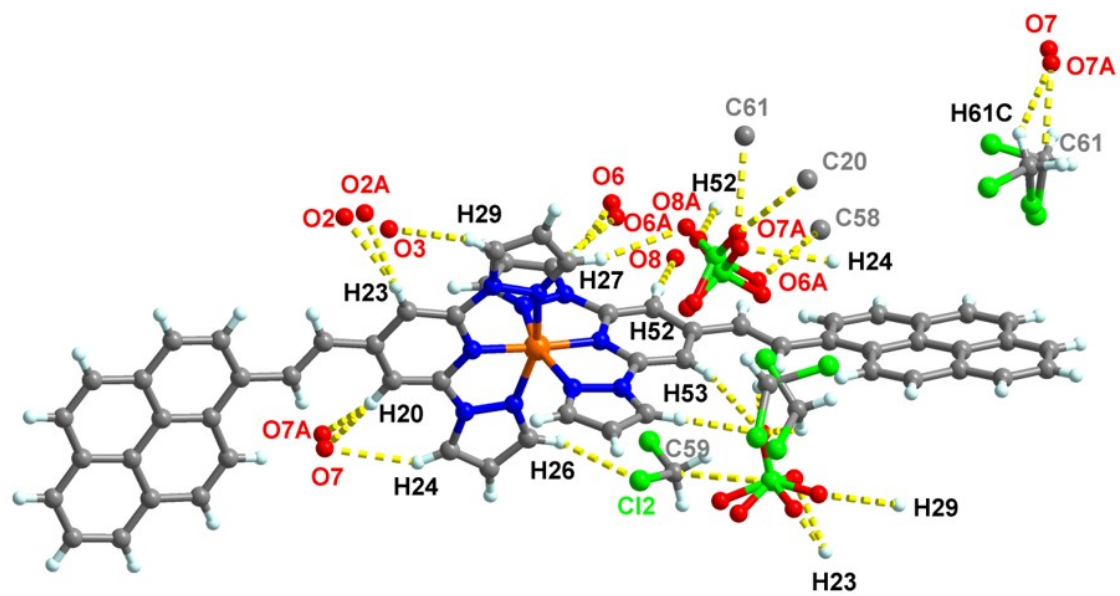

**Fig. S13** The intermolecular short contact interactions (yellow dashed lines) for **2** at 120K.

**Table S6.** Short contact interactions for **2** at 120 K.

---

| <b>2</b>                                  |           |                                                                             |          |
|-------------------------------------------|-----------|-----------------------------------------------------------------------------|----------|
| C20 – H20···O7 <sup>a</sup><br>[x-1,y,z]  | 3.302(5)  | C52 – H52···O8 <sup>a</sup><br>[-x+1,-y+1,-z+1]                             | 3.415(6) |
| C20 – H20···O7A <sup>b</sup><br>[x-1,y,z] | 3.20(3)   | C52 – H52···O8A <sup>b</sup><br>[-x+1,-y+1,-z+1]                            | 3.52(3)  |
| C23 – H23···O2 <sup>a</sup><br>[x,y+1,z]  | 3.271(8)  | C53 – H53···O4                                                              | 3.409(3) |
| C23 – H23···O2A <sup>b</sup><br>[x,y+1,z] | 3.222(14) | C58 – H58···O6 <sup>a</sup><br>[-x+1,-y+1,-z+1]                             | 3.328(6) |
| C24 – H24···O7 <sup>a</sup><br>[x-1,y,z]  | 3.455(6)  | C58 – H58···O6A <sup>b</sup><br>[-x+1,-y+1,-z+1]                            | 3.11(3)  |
| C26 – H26···Cl 1                          | 3.803(6)  | C60 <sup>a</sup> - H60B <sup>a</sup> ···O4                                  | 3.305(0) |
| C26 – H26···Cl 2                          | 3.404(4)  | C60A <sup>b</sup> - H60D <sup>b</sup> ···O4                                 | 3.143(6) |
| C27 – H27···O8A <sup>b</sup>              | 3.53(2)   | C61 <sup>a</sup> - H61A <sup>a</sup> ···O7 <sup>a</sup><br>[-x+2,-y+1,-z+1] | 3.245(8) |
| C29 – H29···O3 <sup>a</sup><br>[x,y+1,z]  | 3.473(8)  | C61A <sup>b</sup> - H61C <sup>b</sup> O7A <sup>b</sup><br>[-x+2,-y+1,-z+1]  | 3.37(4)  |
| C49 – H49A···O4                           | 3.325(3)  |                                                                             |          |

---

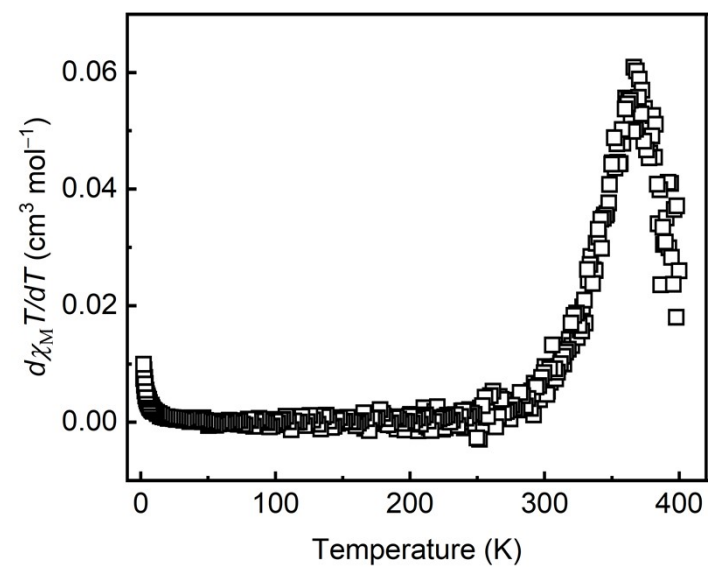

**Fig. S14.**  $d(\chi_M T)/dT$  versus  $T$  for complex **1**.

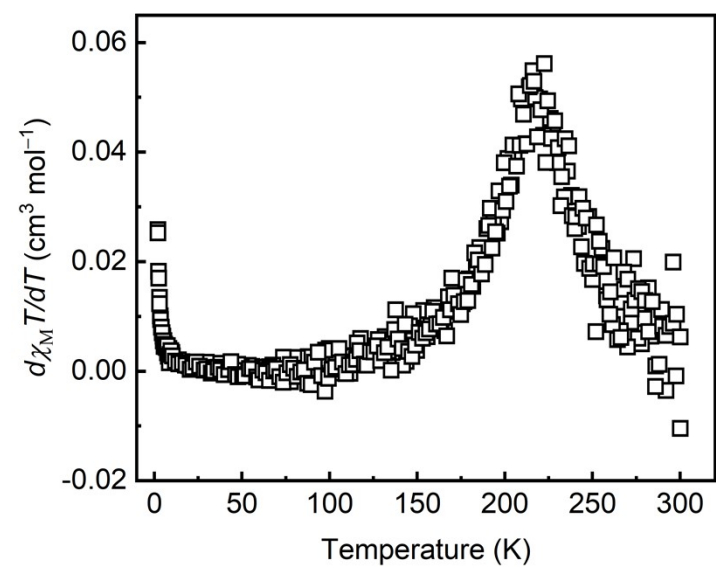

**Fig. S15.**  $d(\chi_M T)/dT$  versus  $T$  for complex **2**.

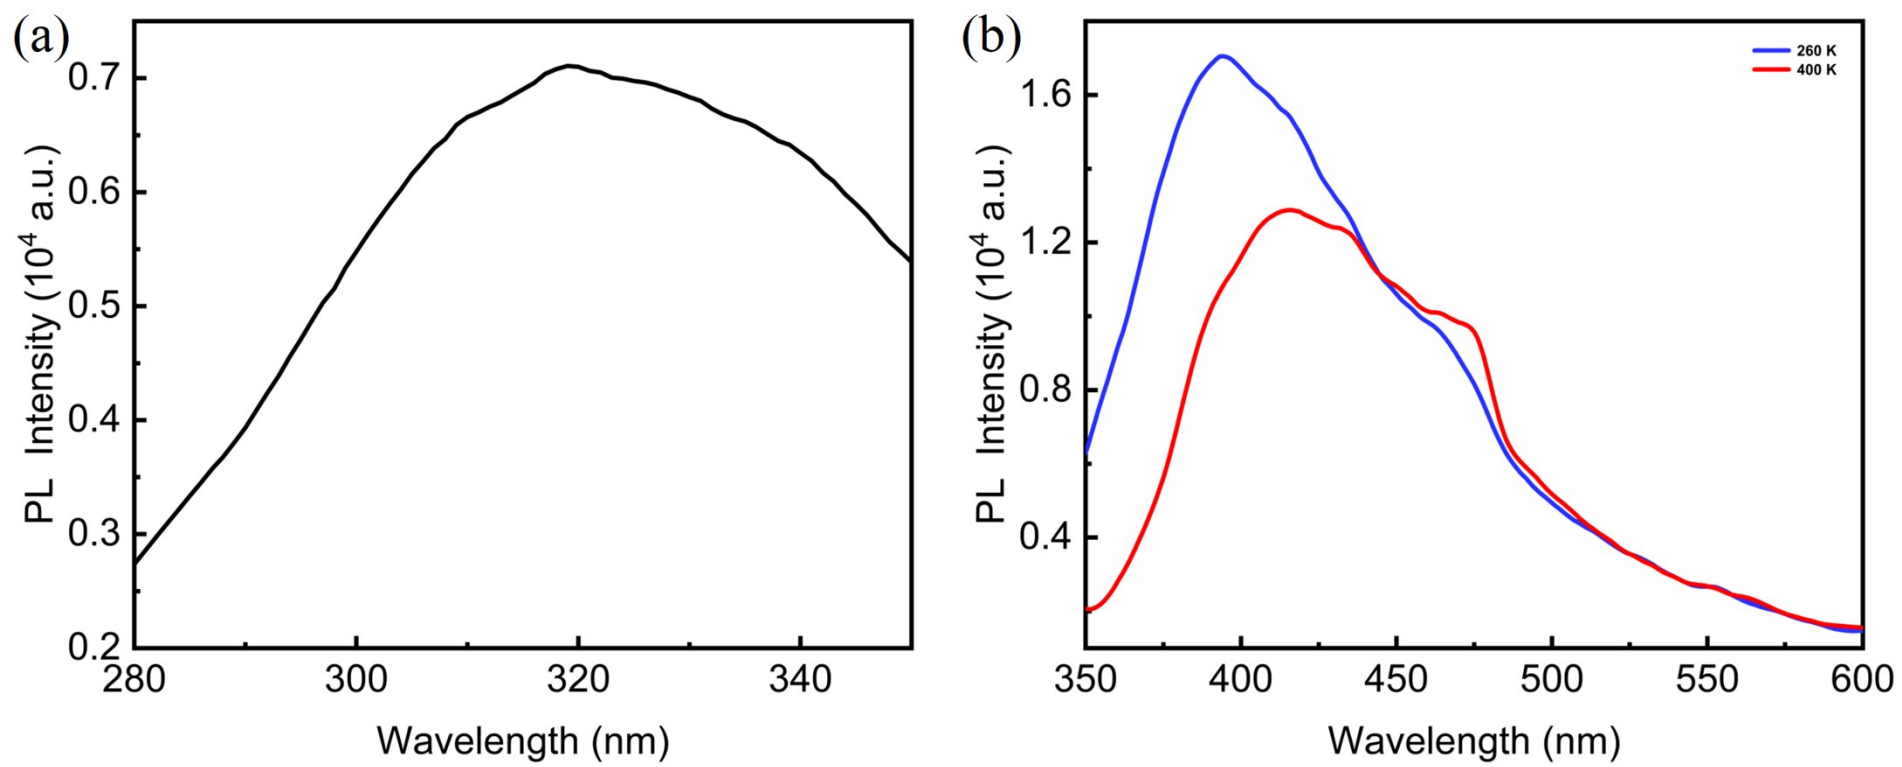

**Fig. S16** (a) Luminescence excitation spectrum for the complex **1** in the solid state at 260 K ( $\lambda_{\text{ex}} = 320$  nm). (b) Luminescence emission spectra for the complex **1** in the solid state at 260 K (blue) and 400 K (red).

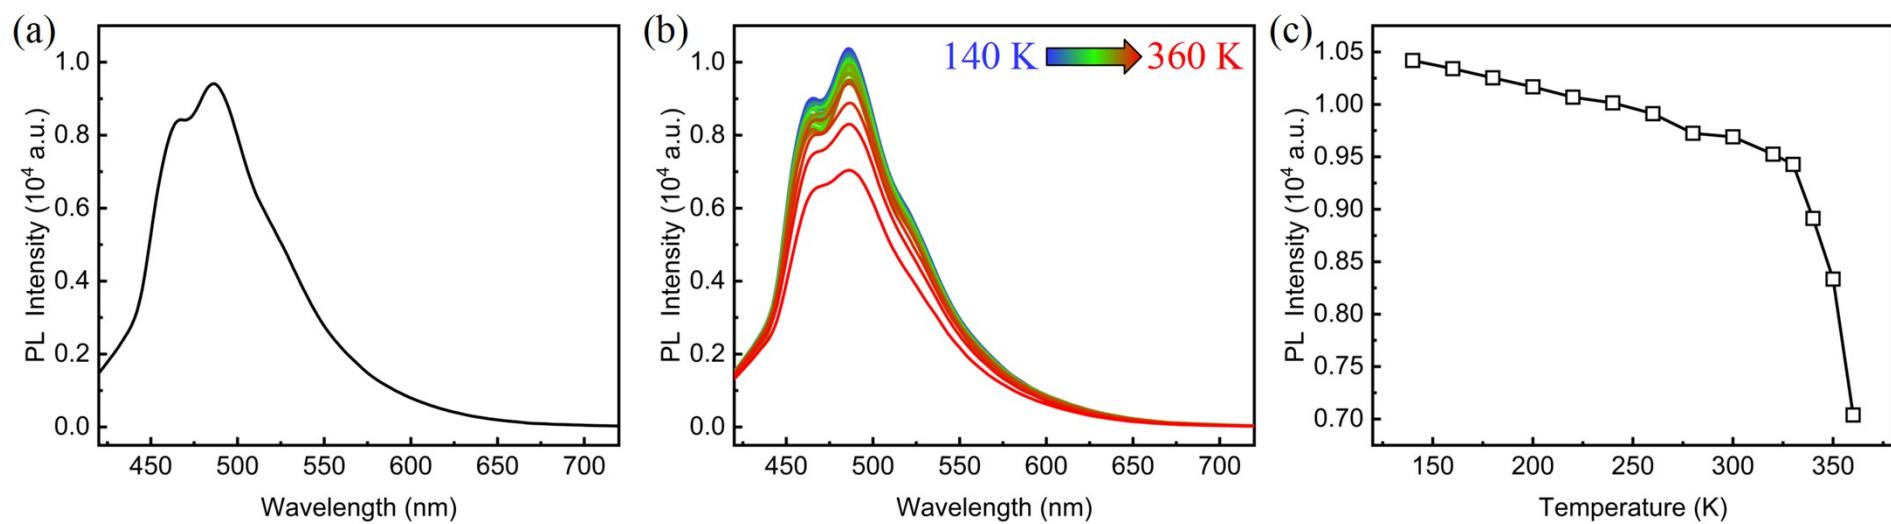

**Fig. S17** (a) Luminescence emission spectra for the ligand L<sub>1</sub> at 300 K ( $\lambda_{\text{ex}} = 387$  nm). (b) Temperature-dependent luminescence emission spectra for ligand L<sub>1</sub> ( $\lambda_{\text{em}} = 485$  nm). (c) Maximum of luminescence emission intensity as a function of temperature for ligand L<sub>1</sub>.

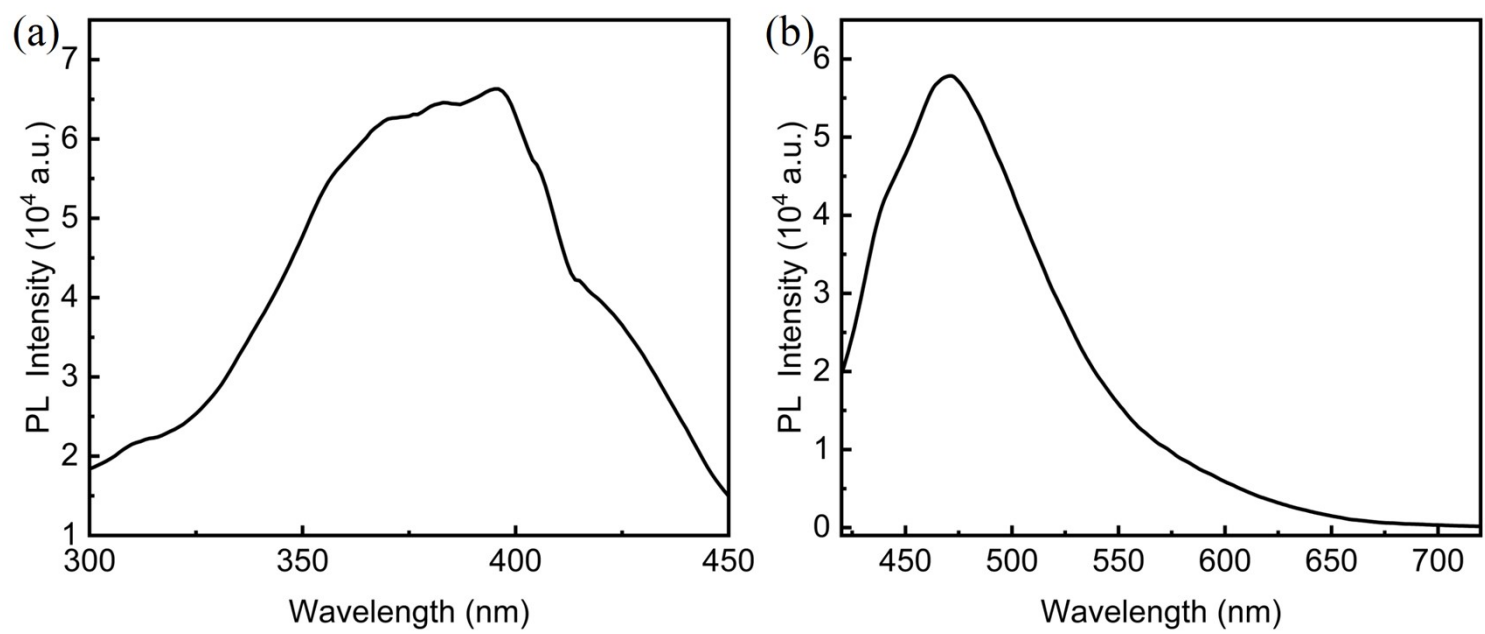

**Fig. S18** (a) Luminescence excitation spectrum for the complex **2** in the solid state at 300 K ( $\lambda_{\text{ex}} = 395$  nm). (b) Luminescence emission spectra for the complex **2** in the solid state at 300 K ( $\lambda_{\text{ex}} = 475$  nm).



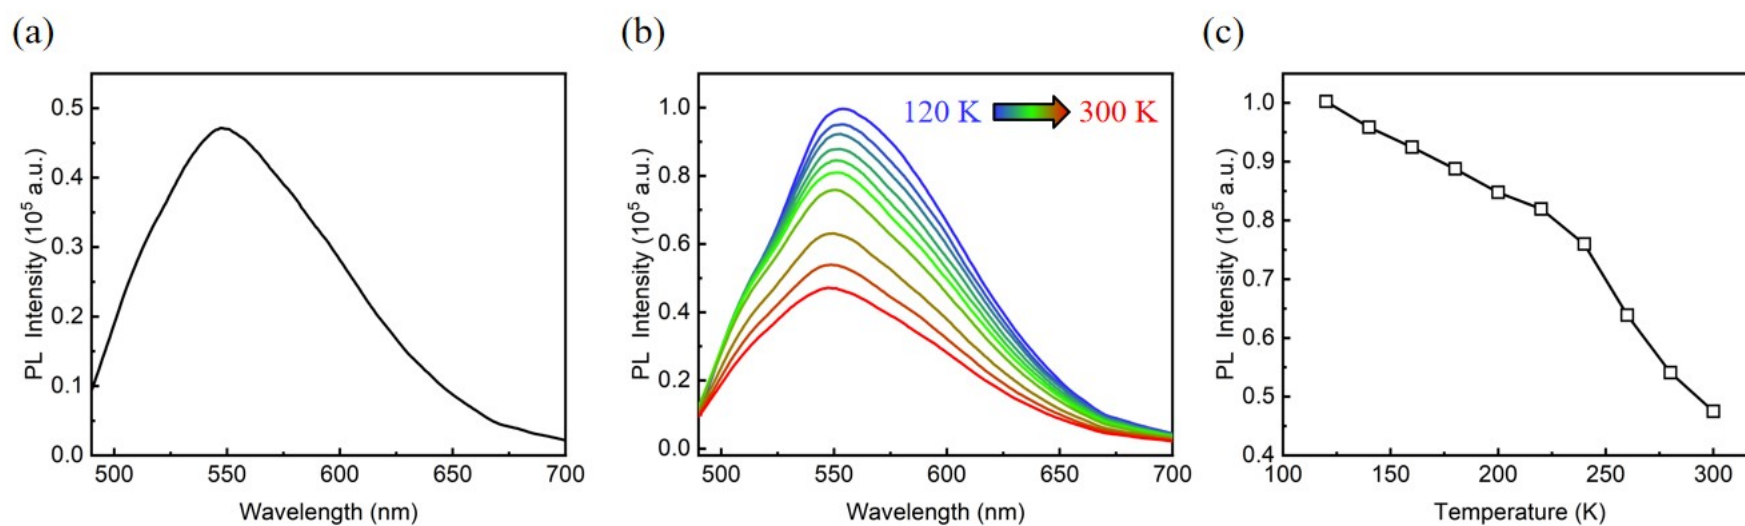

**Fig. S19** (a) Luminescence emission spectra for the ligand  $L_2$  at 300 K ( $\lambda_{ex} = 467$  nm). (b) Temperature-dependent luminescence emission spectra for ligand  $L_2$  ( $\lambda_{em} = 550$  nm). (c) Maximum of luminescence emission intensity as a function of temperature for ligand  $L_2$ .

### Evans' method

Solution magnetic susceptibility data were measured according to the literature's procedure in the temperature range from 268 to 373 K by  $^1\text{H}$  NMR spectroscopy on a Bruker 400 MHz spectrometer using Evans' method. At each temperature point we waited for 15 minutes before measurement. Pure sample of **1** (4.8 mg) was dissolved in 0.7 mL of DMF- $\text{d}_7$ . Pure DMF- $\text{d}_7$  was placed in a capillary insert, and the paramagnetic solution was placed in the outer tube. The calculation equation is as follows:

$$\chi_M T = \left( \frac{3\Delta f}{4\pi m f} M + \chi_M^{\text{dia}} \right) \times T$$

Where  $m$  is the concentration of the paramagnetic solution in  $\text{g mL}^{-1}$ ,  $f$  is the spectrometer frequency in Hz,  $\Delta f$  is the shift of the DMF- $\text{d}_7$  peak in the paramagnetic solution compared to pure DMF- $\text{d}_7$  in Hz.  $\chi_M^{\text{dia}} = M \times 10^{-6} \text{ cm}^3 \text{ mol}^{-1}$  ( $M$  is the molecular weight).

**Table S7.** The calculated  $\chi_M T$  values for **1** at multiple temperatures according to the Evans' method.

| $T$ (K)                                                 | 268     | 273     | 293     | 313     | 333     | 353     | 373     |
|---------------------------------------------------------|---------|---------|---------|---------|---------|---------|---------|
| $f_1$ (Hz)                                              | 1290.64 | 1285.26 | 1265.98 | 1251.82 | 1238.01 | 1227.39 | 1289.02 |
| $f_2$ (Hz)                                              | 1100.05 | 1100.05 | 1100.05 | 1100.51 | 1100.05 | 1100.05 | 1100.05 |
| $\Delta f$ (Hz)                                         | 190.59  | 185.21  | 165.93  | 151.31  | 137.96  | 127.34  | 188.97  |
| $\chi_M T$ ( $\text{cm}^3 \text{ mol}^{-1} \text{ K}$ ) | 3.48    | 3.41    | 3.44    | 3.42    | 3.38    | 3.37    | 3.45    |

(a)

373 K

353 K

333 K

313 K

293 K

273 K

268 K

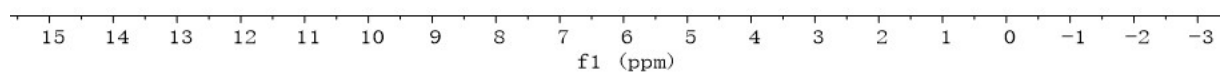

(b)

373 K

353 K

333 K

313 K

293 K

273 K

268 K

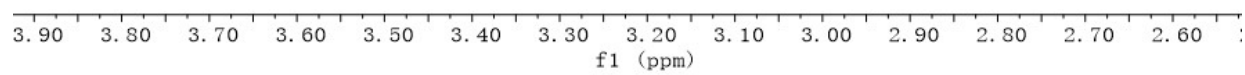

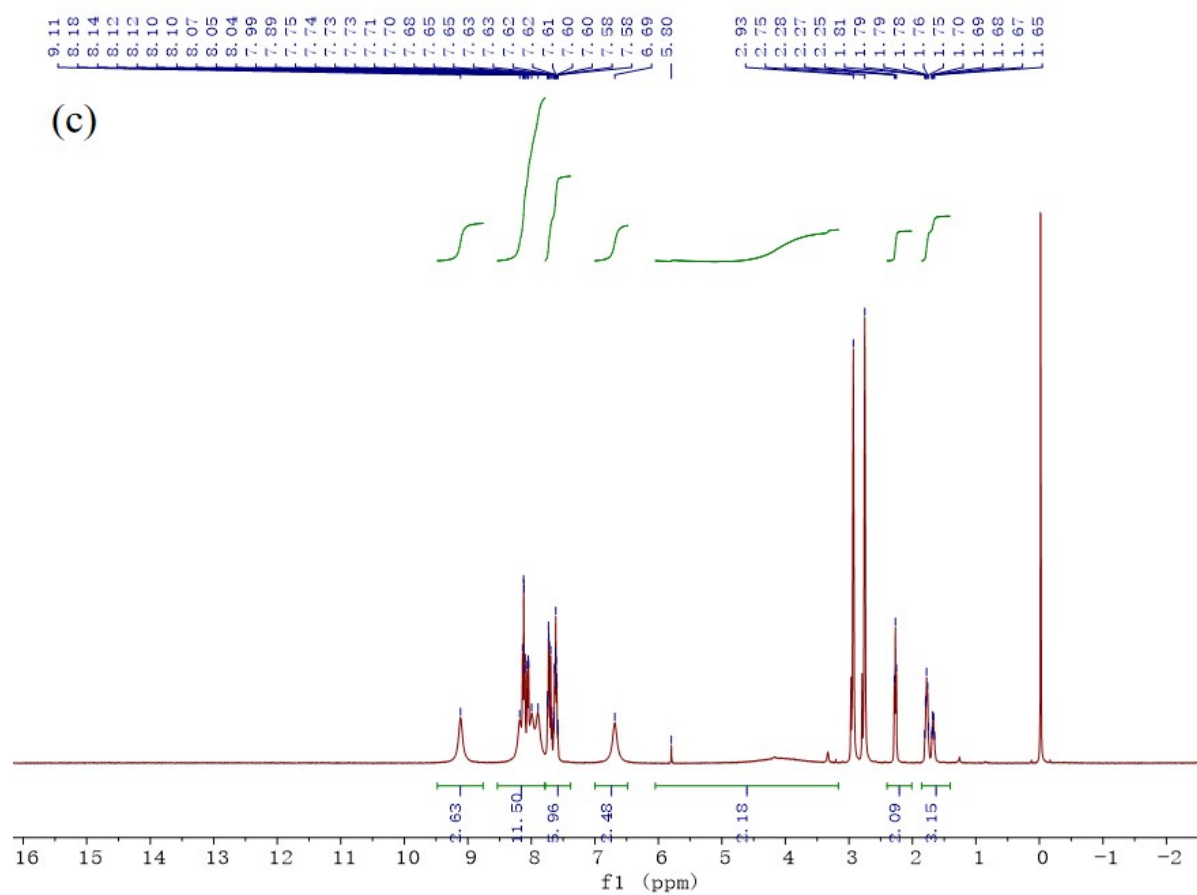

**Fig. S20.** (a) Stacked spectra, obtained by the Evans  $^1\text{H}$  NMR method, from 373 to 268 K for **1** ( $5.0 \times 10^{-3}$  mol L $^{-1}$ ) in DMF- $d_7$  (400 MHz). (b) The enlarged region of solvent residual peaks (\* and \* represent the solvent residual signals in solution and in the inner tube, respectively). (c)  $^1\text{H}$  NMR spectrum of complex **1** in DMF- $d_7$  at room temperature.

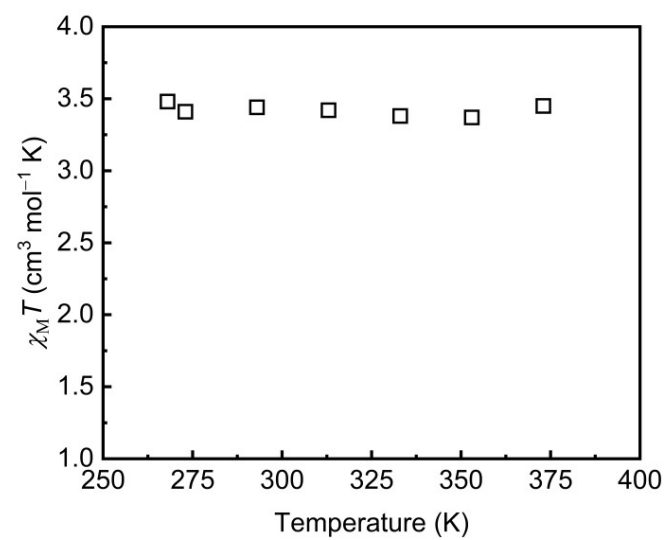

**Fig. S21**  $\chi_M T$  vs T of compound **1** in DMF- $d_7$  solution state Evans method studies (400 MHz).

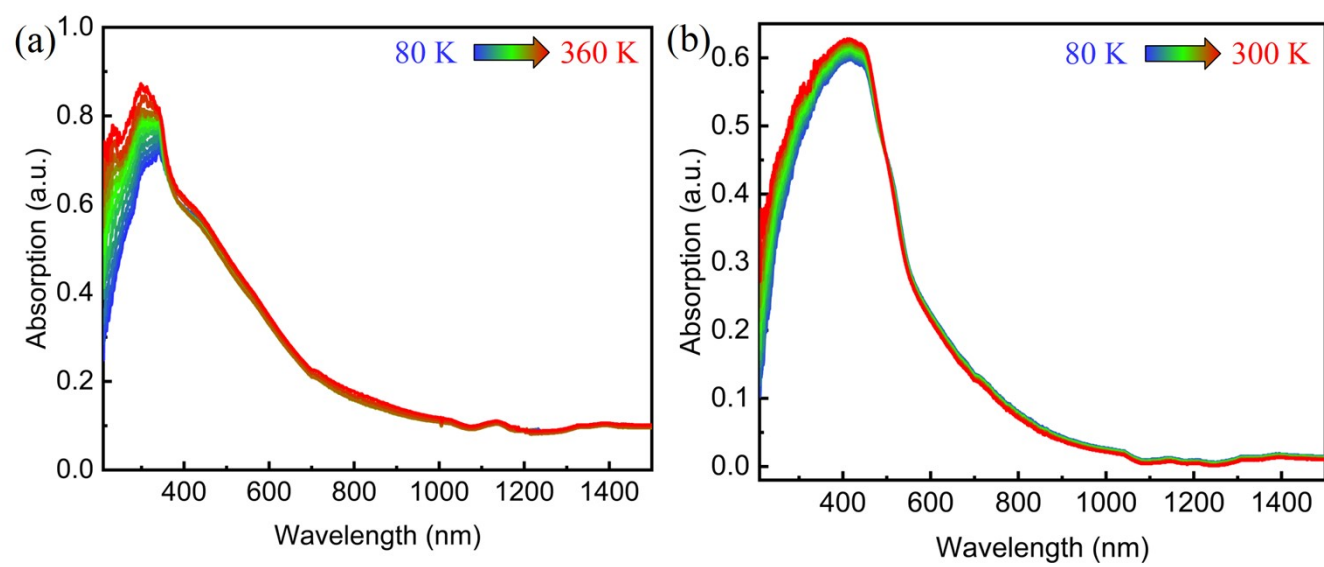

**Fig. S22** Temperature-dependent UV-vis absorption spectroscopy of L<sub>1</sub> (a) and L<sub>2</sub> (b) in the solid state.

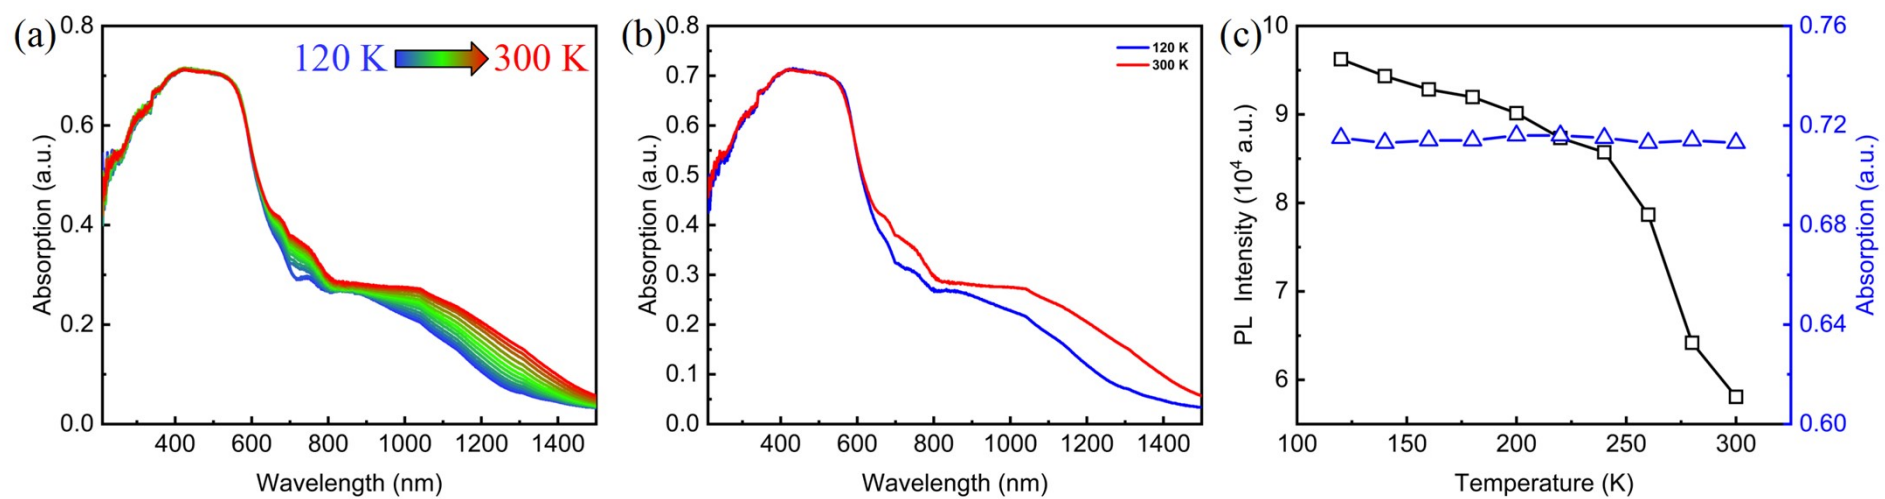

**Fig. S23** (a) Temperature-dependent UV-vis absorption spectroscopy of **2** in the solid state. (b) Temperature-dependent UV-vis absorption spectroscopy of **2** in the solid state at 120 K (blue line) and 300 K (red line). (c) The PL intensity of the maximum emission ( $\lambda_{em} = 475$  nm) (black squares) and absorption intensity centering at 500 nm (blue triangles) profiles as a function of temperature for **2**.

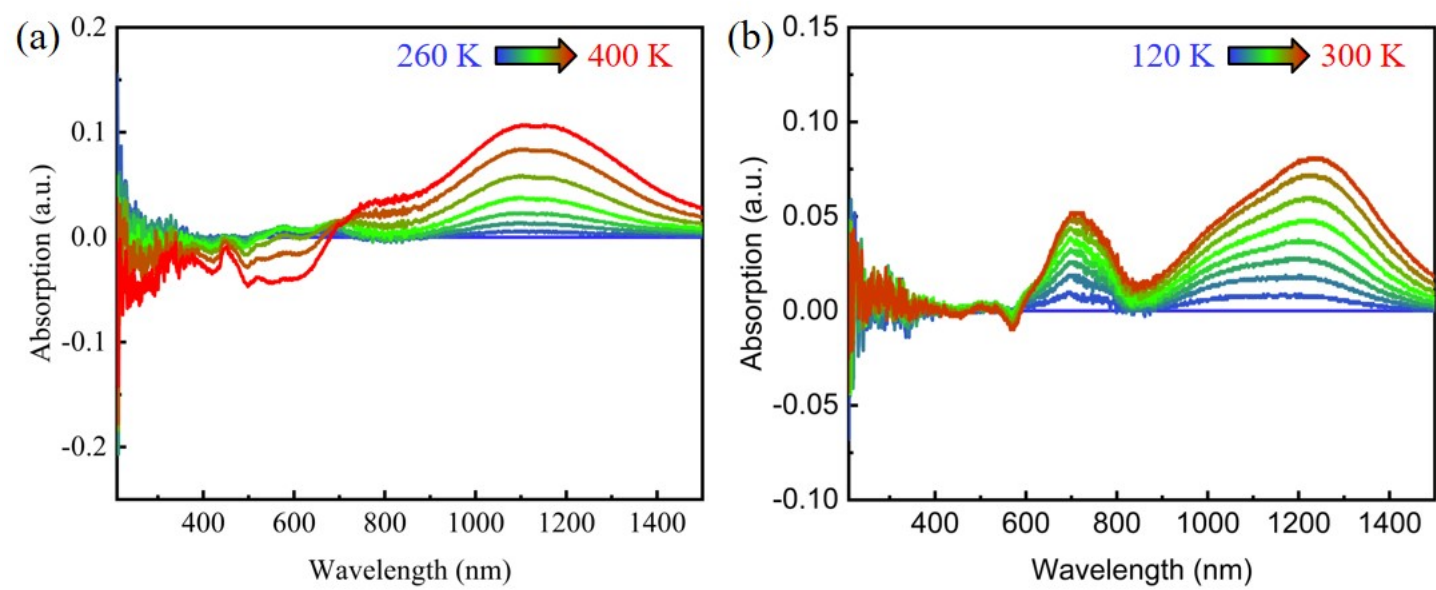

**Fig. S24** The margin calculation between the UV-vis absorption spectrum and the low temperature spectrum of the complex **1** (a) and **2** (b).



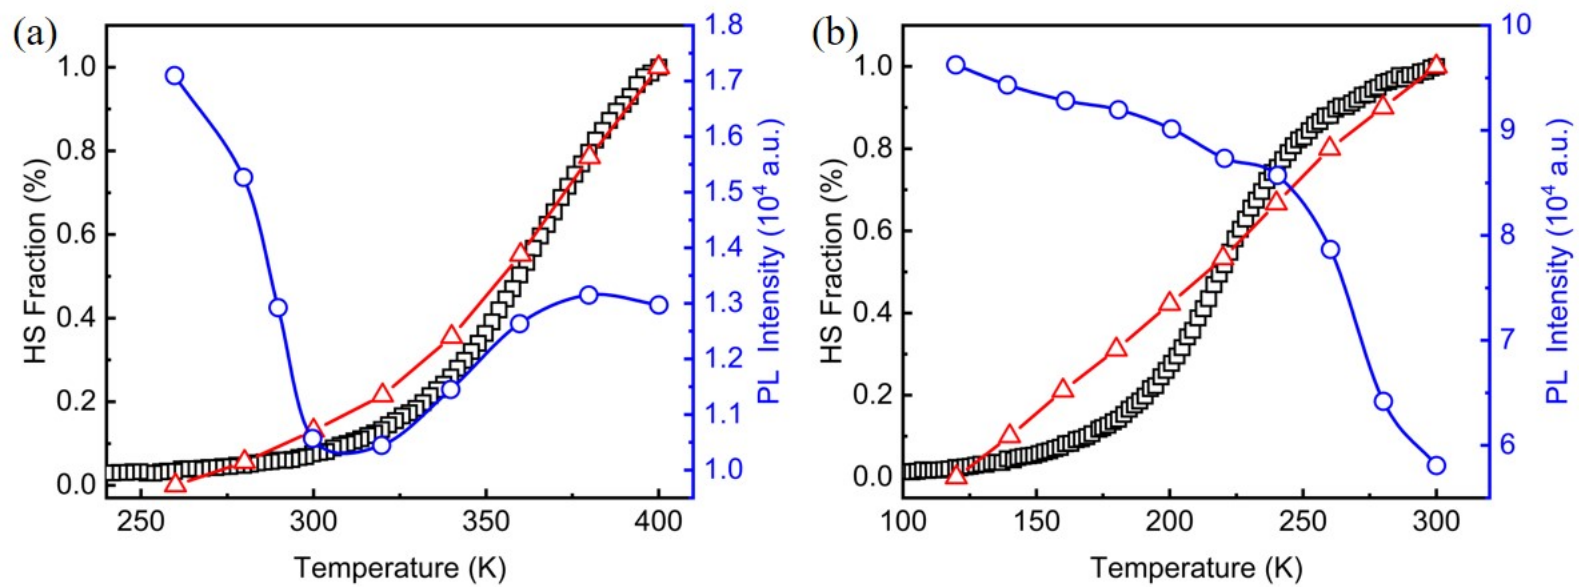

**Fig. S25** Diagram of HS fraction (black square) and maximum luminescent emission intensity (blue circle) of Fe<sup>II</sup> ions in **1** and **2** as a function of temperature, and reconstruction of HS fraction by UV-vis absorption spectra measurements (red triangle).

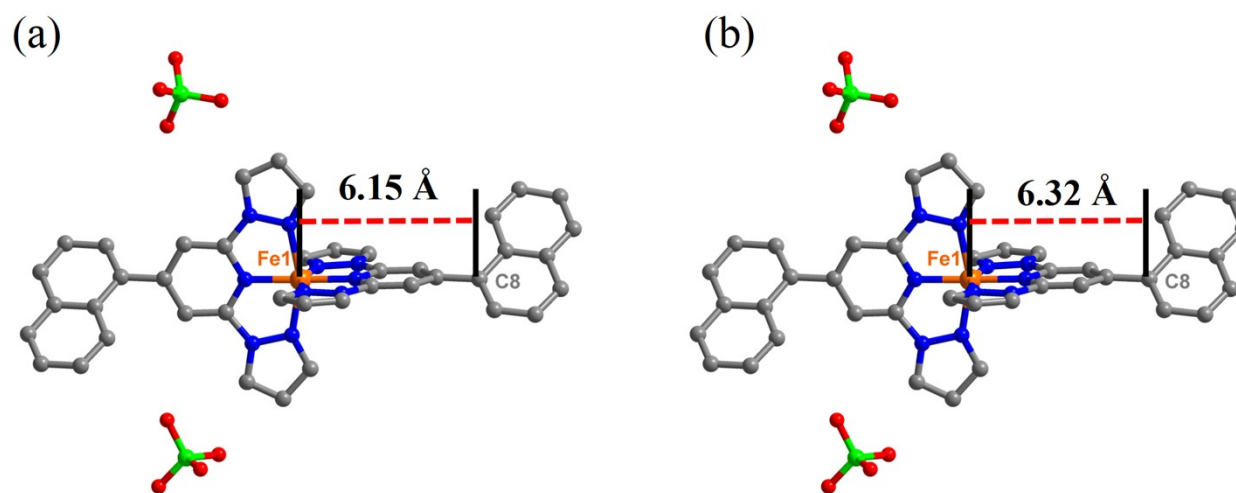

**Fig. S26** Complex **1** at different temperatures, the distance between the Fe<sup>II</sup> center and the modified group (a) 120 K; (b) 400 K. All H atoms and solvent molecules are omitted for clarity. (Atomic colour scheme: Fe, orange; C, gray; O, red; N, blue; Cl, bright green).

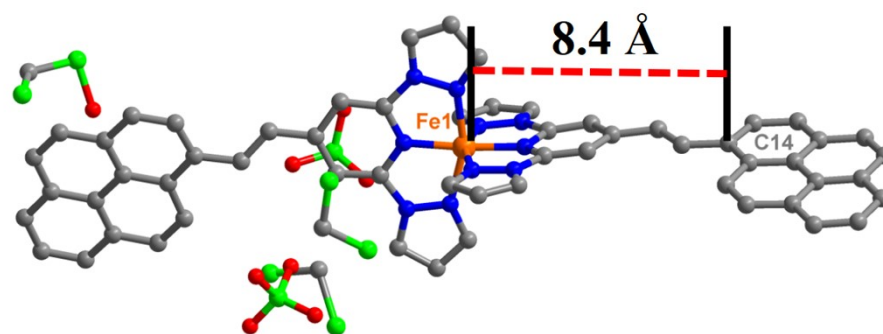

**Fig. S27** Complex **2** at 120 K, the distance between the Fe<sup>II</sup> center and the modified group. All H atoms and solvent molecules are omitted for clarity.

(Atomic colour scheme: Fe, orange; C, gray; O, red; N, blue; Cl, bright green).
